# Supplementary material
Source: Springer Nature journal article supplement (https://www.springermedizin.de/resource/supplementary/13058_2011_2984_MOESM4_ESM.pdf/9703014)

**A**T-47D  
CHD5 IgG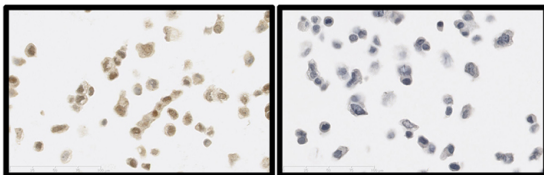ZR-75-1  
CHD5 IgG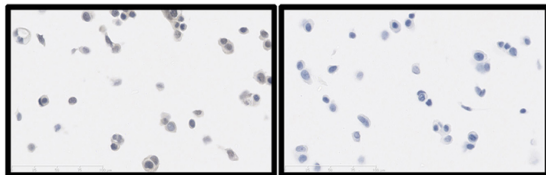**B**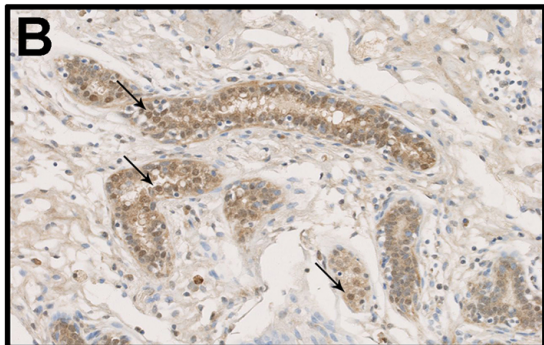**C**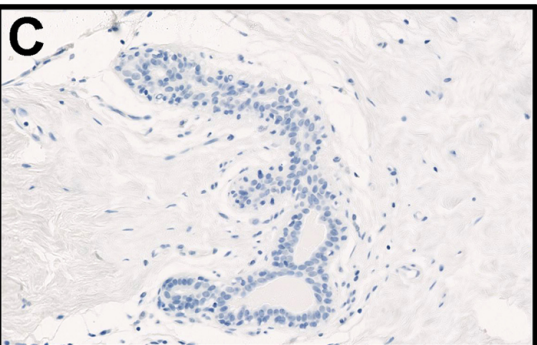**D**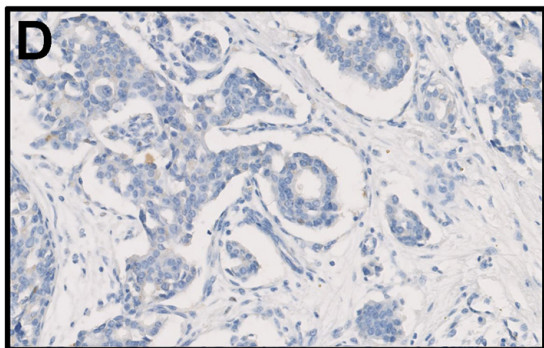**E**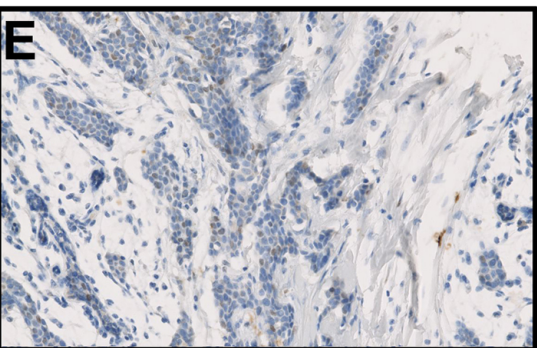**F**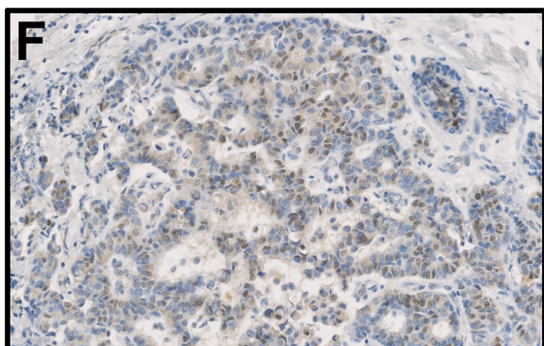**G**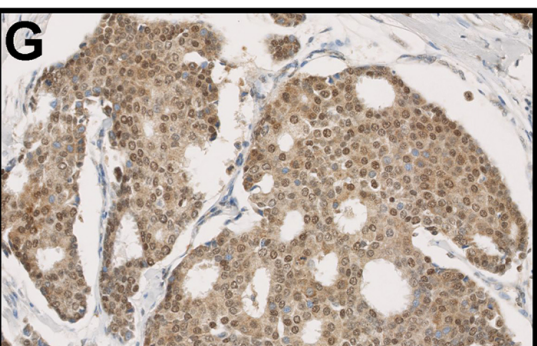

Supplement: MOESM4 [file 9703014]
